# Supplementary material for: Induction of apoptosis in human cancer cells by targeting mitochondria with gold nanoparticles
Source: Royal Society of Chemistry journal article supplement (doi:10.1039/c5nr01483b), 2015-01-01
Supplement: c5nr01483b1.pdf [file c5nr01483b1.pdf]

## Supplementary/Supporting Information

### Induction of Apoptosis in Human Cancer Cells by Targeting Au Nanoparticle to Mitochondria

*Msau Mkandawire\*, Matthias Lakatos, Armin Springer, André Clemens, Dietmar Appelhans, Udo Krause-Buchholz, Wolfgang Pompe, Gerhard Rödel and Martin Mkandawire*

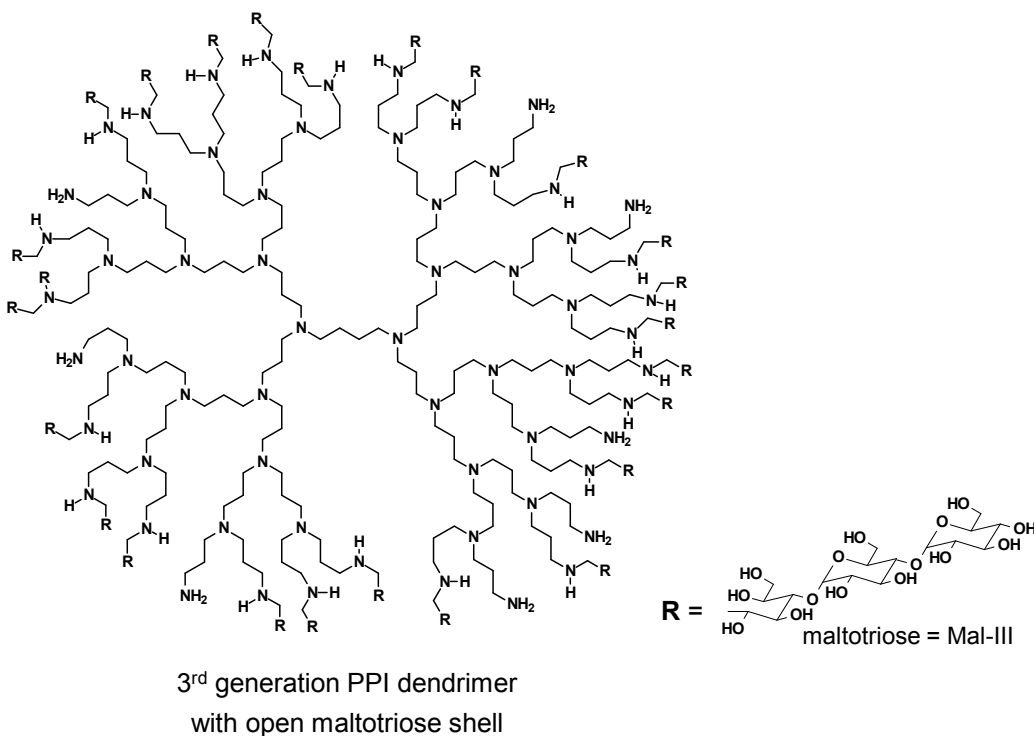

**Figure S1** Scheme of maltotriose-modified 3<sup>rd</sup> generation PPI dendrimers used in this study.

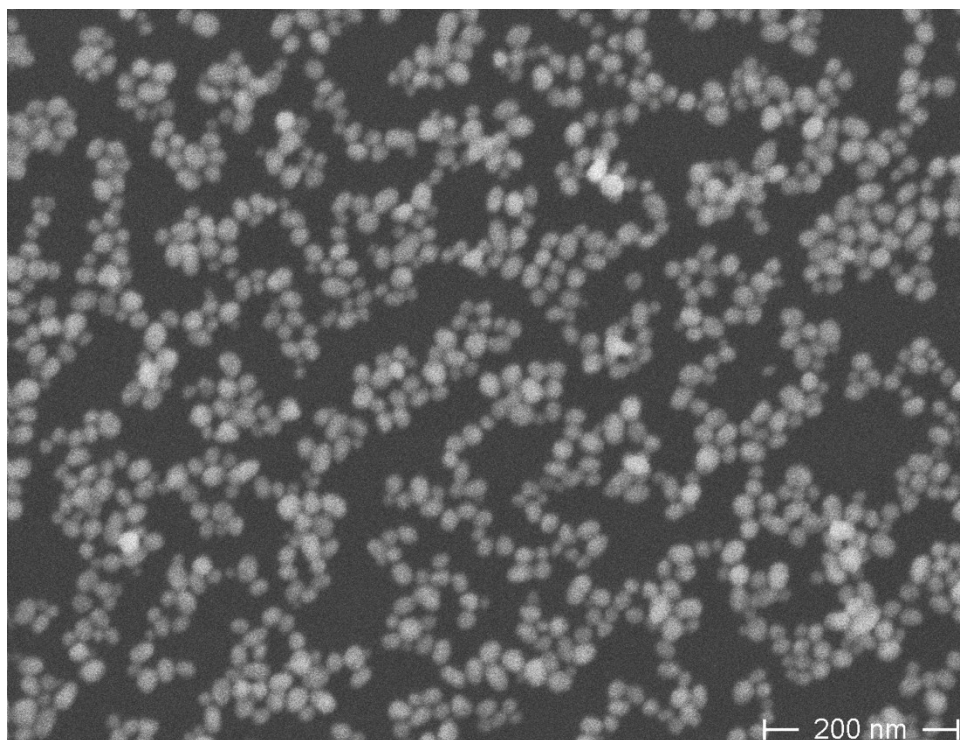

**Figure S2.** Scanning Electron Microscopy image of citrate stabilized AuNPs (20 nm) used in this study.

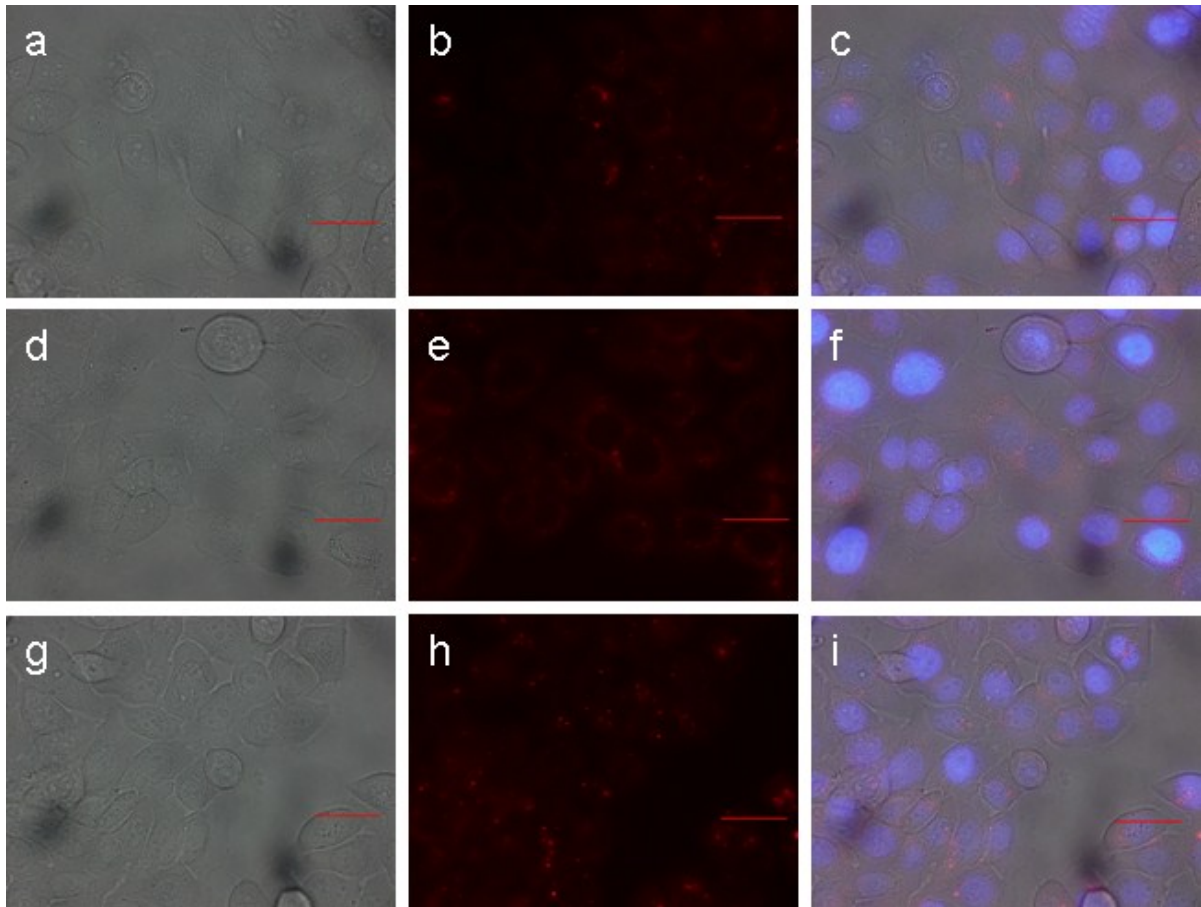

**Figure S3.** Brightfield (left column), caspase 3 fluorescence staining (middle column) and overlay (right column) images of Caspase 3 activity of transfected cells. The top row shows non-transfected cells (dendrimers (a-c), in the middle row, cells transfected with HA-eGFP (d-f), and the bottom row shows cells transfected with mitoTGFP (g-i). All images were taken under same conditions. The scale bar is 30  $\mu$ m.

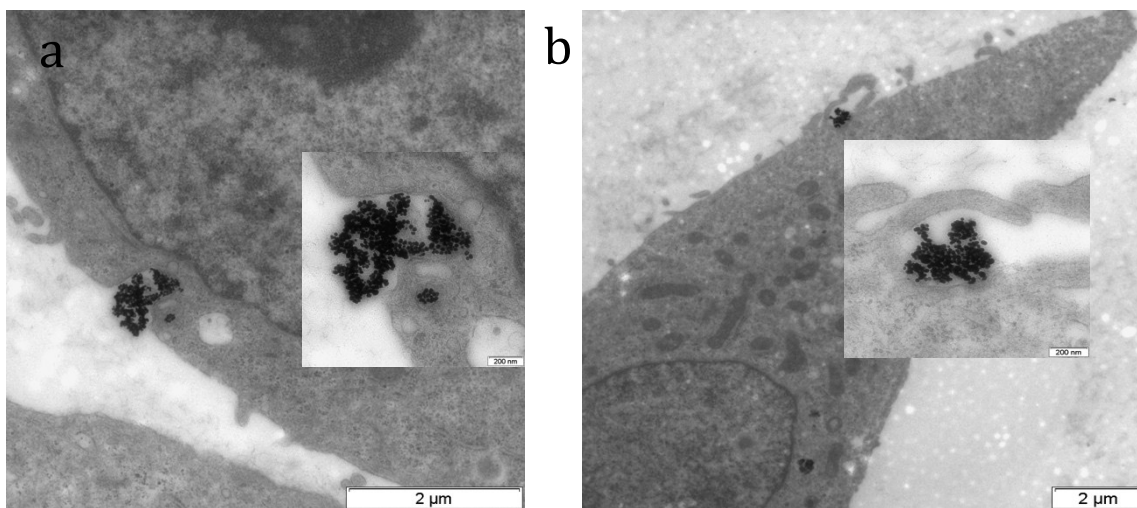

Figure S4: TEM images showing two different uptake mechanisms of dendrimer mediated mitoGFP-AuNP bioconjugates. In (a) bioconjugates were taken up through invagination of the cell membrane. In (b) bioconjugates were taken up through formation of pseudopodia wrapping over the bioconjugates.
